# Supplementary material for: MOF-derived Ru@ZIF-8 catalyst with the extremely low metal Ru loading for selective hydrogenolysis of C–O bonds in lignin model compounds under mild conditions
Source: Royal Society of Chemistry journal article supplement (doi:10.1039/d1cy01787j), 2021-12-14
Supplement: d1cy01787j1.pdf [file d1cy01787j1.pdf]

## 1 Supporting Information

### 2 MOF-derived Ru@ZIF-8 catalyst with the extremely low metal Ru loading for selective 3 hydrogenolysis of C-O bonds in lignin model compounds under mild conditions

4 Wei Jiang<sup>a</sup>, Jing-Pei Cao<sup>a,b\*</sup>, Jin-Xuan Xie<sup>a</sup>, Liang Zhao<sup>a</sup>, Chuang Zhang<sup>a</sup>, Chen Zhu<sup>a</sup>, Xiao-Yan  
5 Zhao<sup>a</sup>, Yun-Peng Zhao<sup>a</sup>, Jian-Li Zhang<sup>b</sup>

6 <sup>a</sup> Jiangsu Province Engineering Research Center of Fine Utilization of Carbon Resources, China  
7 University of Mining & Technology, Xuzhou 221116, Jiangsu, China

8 <sup>b</sup> State Key Laboratory of High-Efficient Utilization of Coal and Green Chemical Engineering,  
9 Ningxia University, Yinchuan 750021, Ningxia, China

## 10 Experimental section

11 **Materials.** Ru(acac)<sub>3</sub>, Zn(NO<sub>3</sub>)<sub>2</sub>•6H<sub>2</sub>O, 2-methylimidazole, benzene (>99.7% GC assay) and  
12 diphenyl ether (DPE) (>99% GC assay), methylcyclohexane (>99% GC assay), phenethyl phenyl  
13 ether (PPE) (> 98% GC assay) and toluene (>99% GC assay) were purchased from Aladdin  
14 Chemistry Co., Ltd. Cyclohexanol (>99% GC assay) and benzyl phenyl ether (BPE) (>98% GC  
15 assay) were gained from TCI Development Co., Ltd. Phenol (>99%), methanol (>99), cyclohexane  
16 (>99.7%) and isopropanol (>99.7%) were provided by Xilong Scientific Co., Ltd. H<sub>2</sub> (>99.999%)  
17 and Ar (>99.999%) were supplied by Xuzhou Specialty Gases Co., Ltd.

18 **Catalyst characterization.** The porous structure of catalysts was determined by a V-Sorb  
19 4800TP N<sub>2</sub> adsorption-desorption instrument. The catalysts were degassed in N<sub>2</sub> atmosphere at 300  
20 °C for 10 h in order to remove gas and moisture absorbed on the catalyst before adsorption. The  
21 related information of total pore volume, specific surface area and average pore diameter were  
22 analyzed by absorbed volume of nitrogen at a relative pressure P/P<sub>0</sub> of 0.99 and the multipoint BET

---

\* Corresponding author. Tel./fax: +86 516 83591059. E-mail address: caojingpei@cumt.edu.cn (J.-P. Cao)

23 equation. The measurement accuracy of N<sub>2</sub> adsorption-desorption instrument is that the repeatability  
24 error is less than 1.5%.

25 X-ray diffractometer (XRD) was performed to test the crystalline structures of the samples on a  
26 Bruker D8 Advance diffractometer using Cu-K $\alpha$  radiation at 40 kV and 30 mA. The 2 $\theta$  angel range  
27 was scanned from 5° to 90° at a step size of 4 °/min. XRD diffractometer has high precision that the  
28 reproducibility of the diffraction angle is up to 0.0001°.

29 Raman spectra were collected on a microscopic confocal Raman spectrometer (HORIBA  
30 EVOLUTION) with a 532 nm laser.

31 The inductively coupled plasma optical emission spectrometry (ICP-OES, Agilent 720ES)  
32 measurement was conducted to analyze the metal elemental of the synthesized materials.

33 The morphologies of the catalysts were investigated by ZEISS Gemini SEM 500 scanning  
34 electron microscope (SEM) and FEI Talos S-FEG high-angle annular dark-field scanning  
35 transmission electron microscopic (HAADF-STEM).

36 FEI Tecnai G2 F20 transmission electron microscopy (TEM) was employed to investigate the  
37 morphologies of the catalysts. The sample was mixed with alcohol and deposited on a Cu grid covered  
38 with a perforated carbon membrane.

39 The reacted products were analyzed by Thermo Fisher Scientific Trace1300-ISQ7000 gas  
40 chromatograph/mass spectrometer (GC-MS). Liquid analysis was implemented on a Shimadzu GC-  
41 2014 gas chromatograph (GC) equipped with a flame ionization detector (FID) for isolating  
42 hydrocarbons on an alumina Bound/Na<sub>2</sub>SO<sub>4</sub> capillary column. Argon was used as the carrier gas and  
43 protective gas. The determined procedure of GC was as follows: The initial temperature value of  
44 column oven was set to 40. Ramp 1 was later adjusted at 1 °C /min to 60 °C. Ramp 2 was adjusted at  
45 15 °C /min from 60 to 250 °C. The split ratio of chromatographic column was 39:1. The injector

46 temperature was 250 °C, and injected sample volume was 0.4  $\mu\text{L}$ . The external standard analysis was  
47 used for quantification.

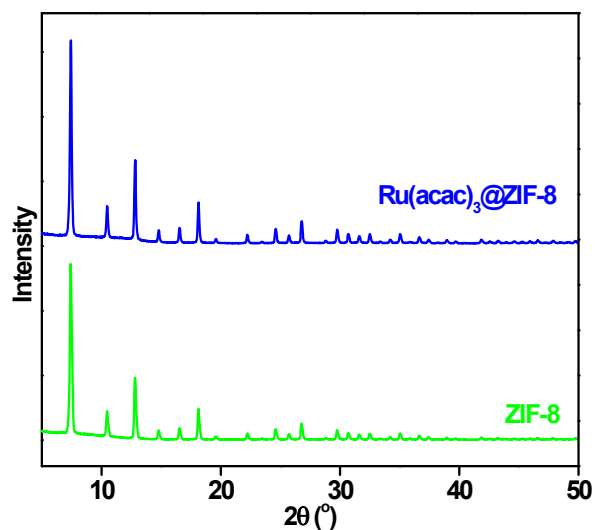

48

49

Fig. S1 XRD patterns of the ZIF-8 and Ru(acac)<sub>3</sub>@ZIF-8

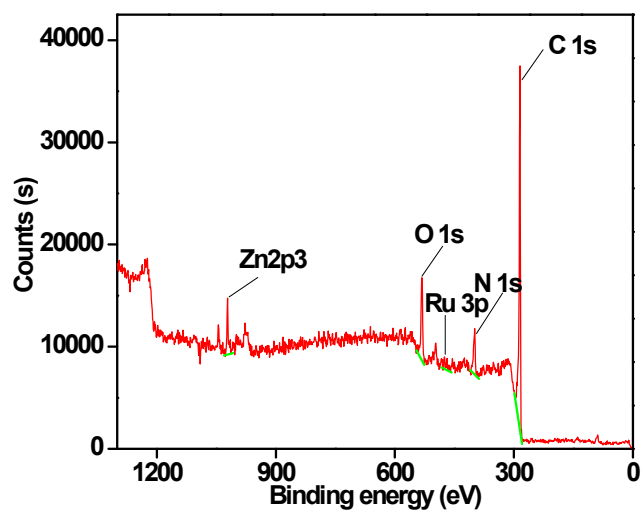

50

51

Fig. S2 XPS spectra for the survey scan of fresh Ru@ZIF-8

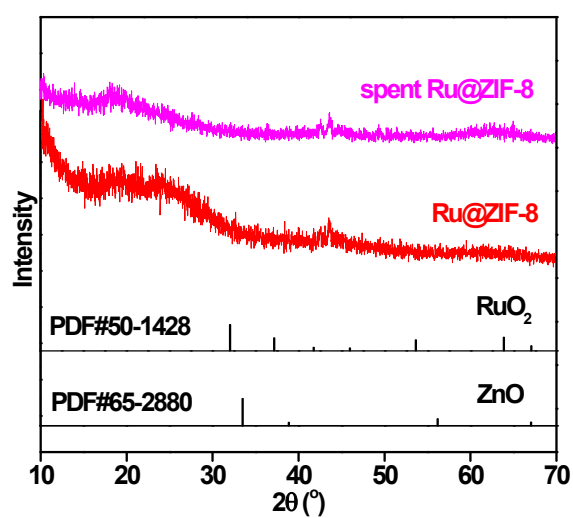

52

53

Fig. S3 XRD patterns of the fresh and spent Ru@ZIF-8 (after four cycles)

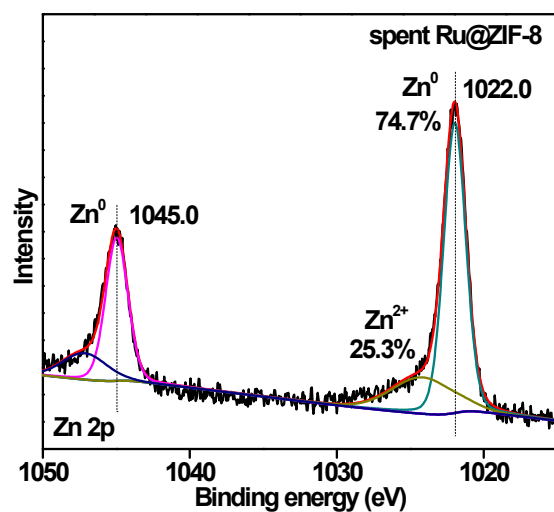

54

55 **Fig. S4** XPS spectra for Zn 2p of the spent Ru@ZIF-8 (after four cycles)

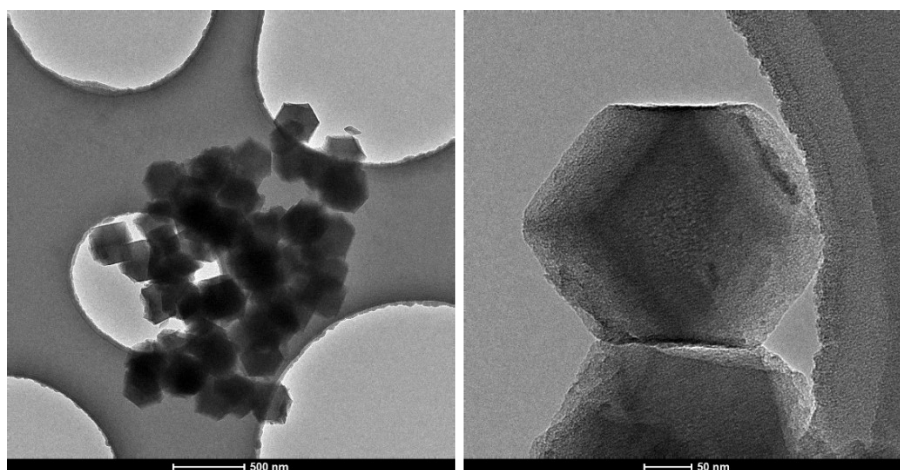

56

57 **Fig. S5** TEM images of the spent Ru@ZIF-8 (after four cycles)

58 **Table S1** The content of Zn or Ru metal in the samples <sup>a</sup>

| sample                       | Zn metal content (wt.%) | Ru metal content (wt.%) |
|------------------------------|-------------------------|-------------------------|
| ZIF-8                        | 25.5704                 | 0                       |
| Ru(acac) <sub>3</sub> @ZIF-8 | 23.8695                 | 0.0118                  |

59 <sup>a</sup> detected by ICP-OES.
